# Supplementary material for: The structure of fluoride-containing bioactive glasses: new insights from first-principles calculations and solid state NMR spectroscopy
Source: Royal Society of Chemistry journal article supplement (doi:10.1039/c2jm30890h), 2012-01-01
Supplement: c2jm30890h.pdf [file c2jm30890h.pdf]

## **SUPPLEMENTARY INFORMATION.**

### **The structure of fluoride-containing bioactive glasses: new insights from first-principles calculations and solid state NMR spectroscopy.**

*Alfonso Pedone,<sup>1\*</sup> Thibault Charpentier,<sup>2\*</sup> and Maria Cristina Menziani*

<sup>1</sup>Dipartimento di Chimica, Università di Modena e Reggio Emilia, Via G. Campi 183, 41125 Modena,

ITALIA

<sup>2</sup>CEA, IRAMIS, Service Interdisciplinaire sur les Systèmes Moléculaires et Matériaux, LSDRM,

UMR CEA/CNRS 3299, F-91191 Gif-sur-Yvette cedex, FRANCE

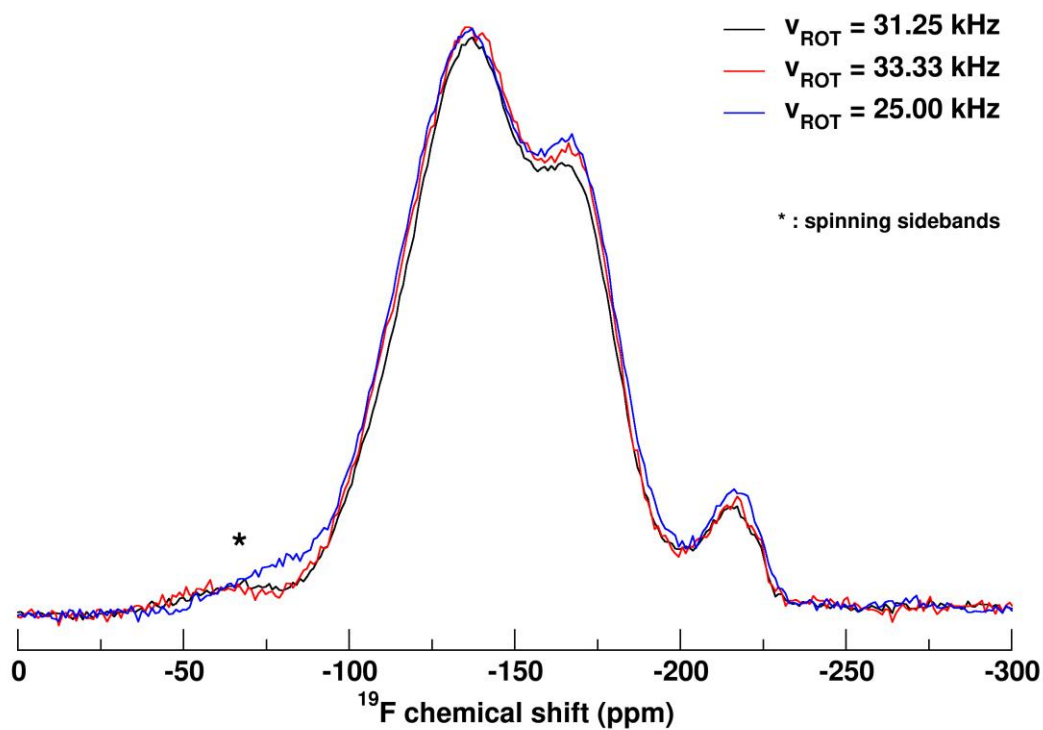

**Figure S.1.**  $^{19}\text{F}$  MAS NMR spectra at different spinning rate showing that shoulder at -75 ppm is a spinning sidebands (of small intensity confirming the fact that 31.25 kHz is high enough to average out the CSA as well as dipolar interactions) whereas the small band at  $\sim -220$  ppm is a real band (that can be attributed to  $\text{FNa}_6$  cluster).

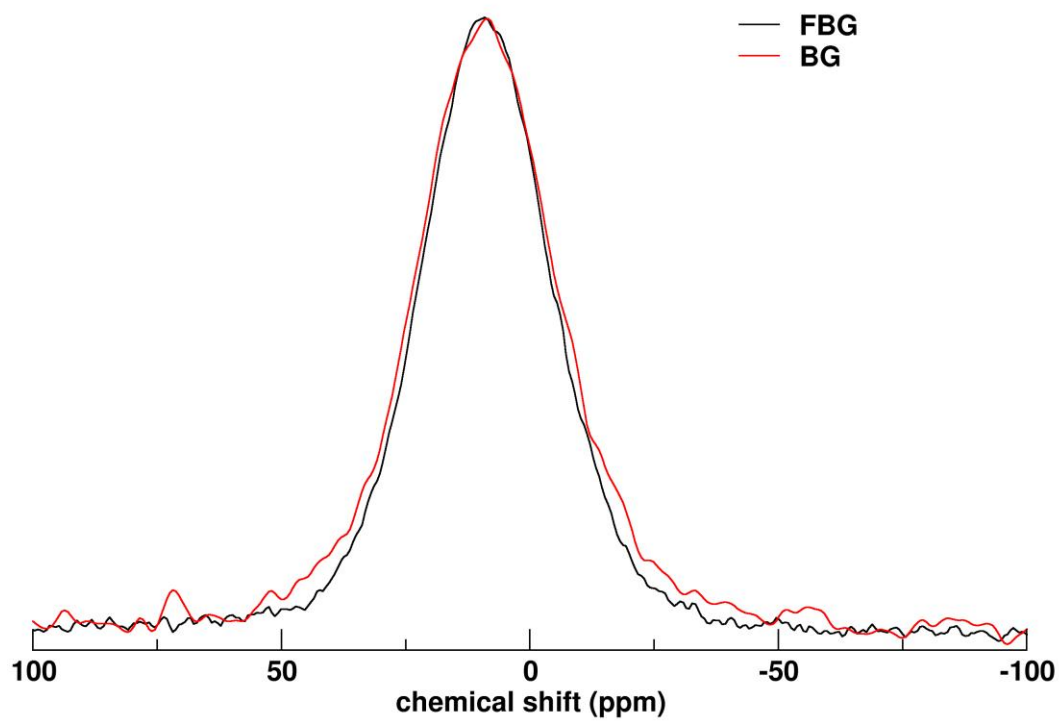

**Figure S.2:** Comparison between the static (i.e. non spinning sample)  $^{31}\text{P}$  NMR spectra of FBG and BG.
